# Supplementary material
Source: PubMed Central journal article supplement (PMC4741339)
Supplement: supp_pp.15.00223_PP2015-00223R2_Supplemental_Materialfig1.pdf [file supp_pp.15.00223_PP2015-00223R2_Supplemental_Materialfig1.pdf]

# Average monthly climate

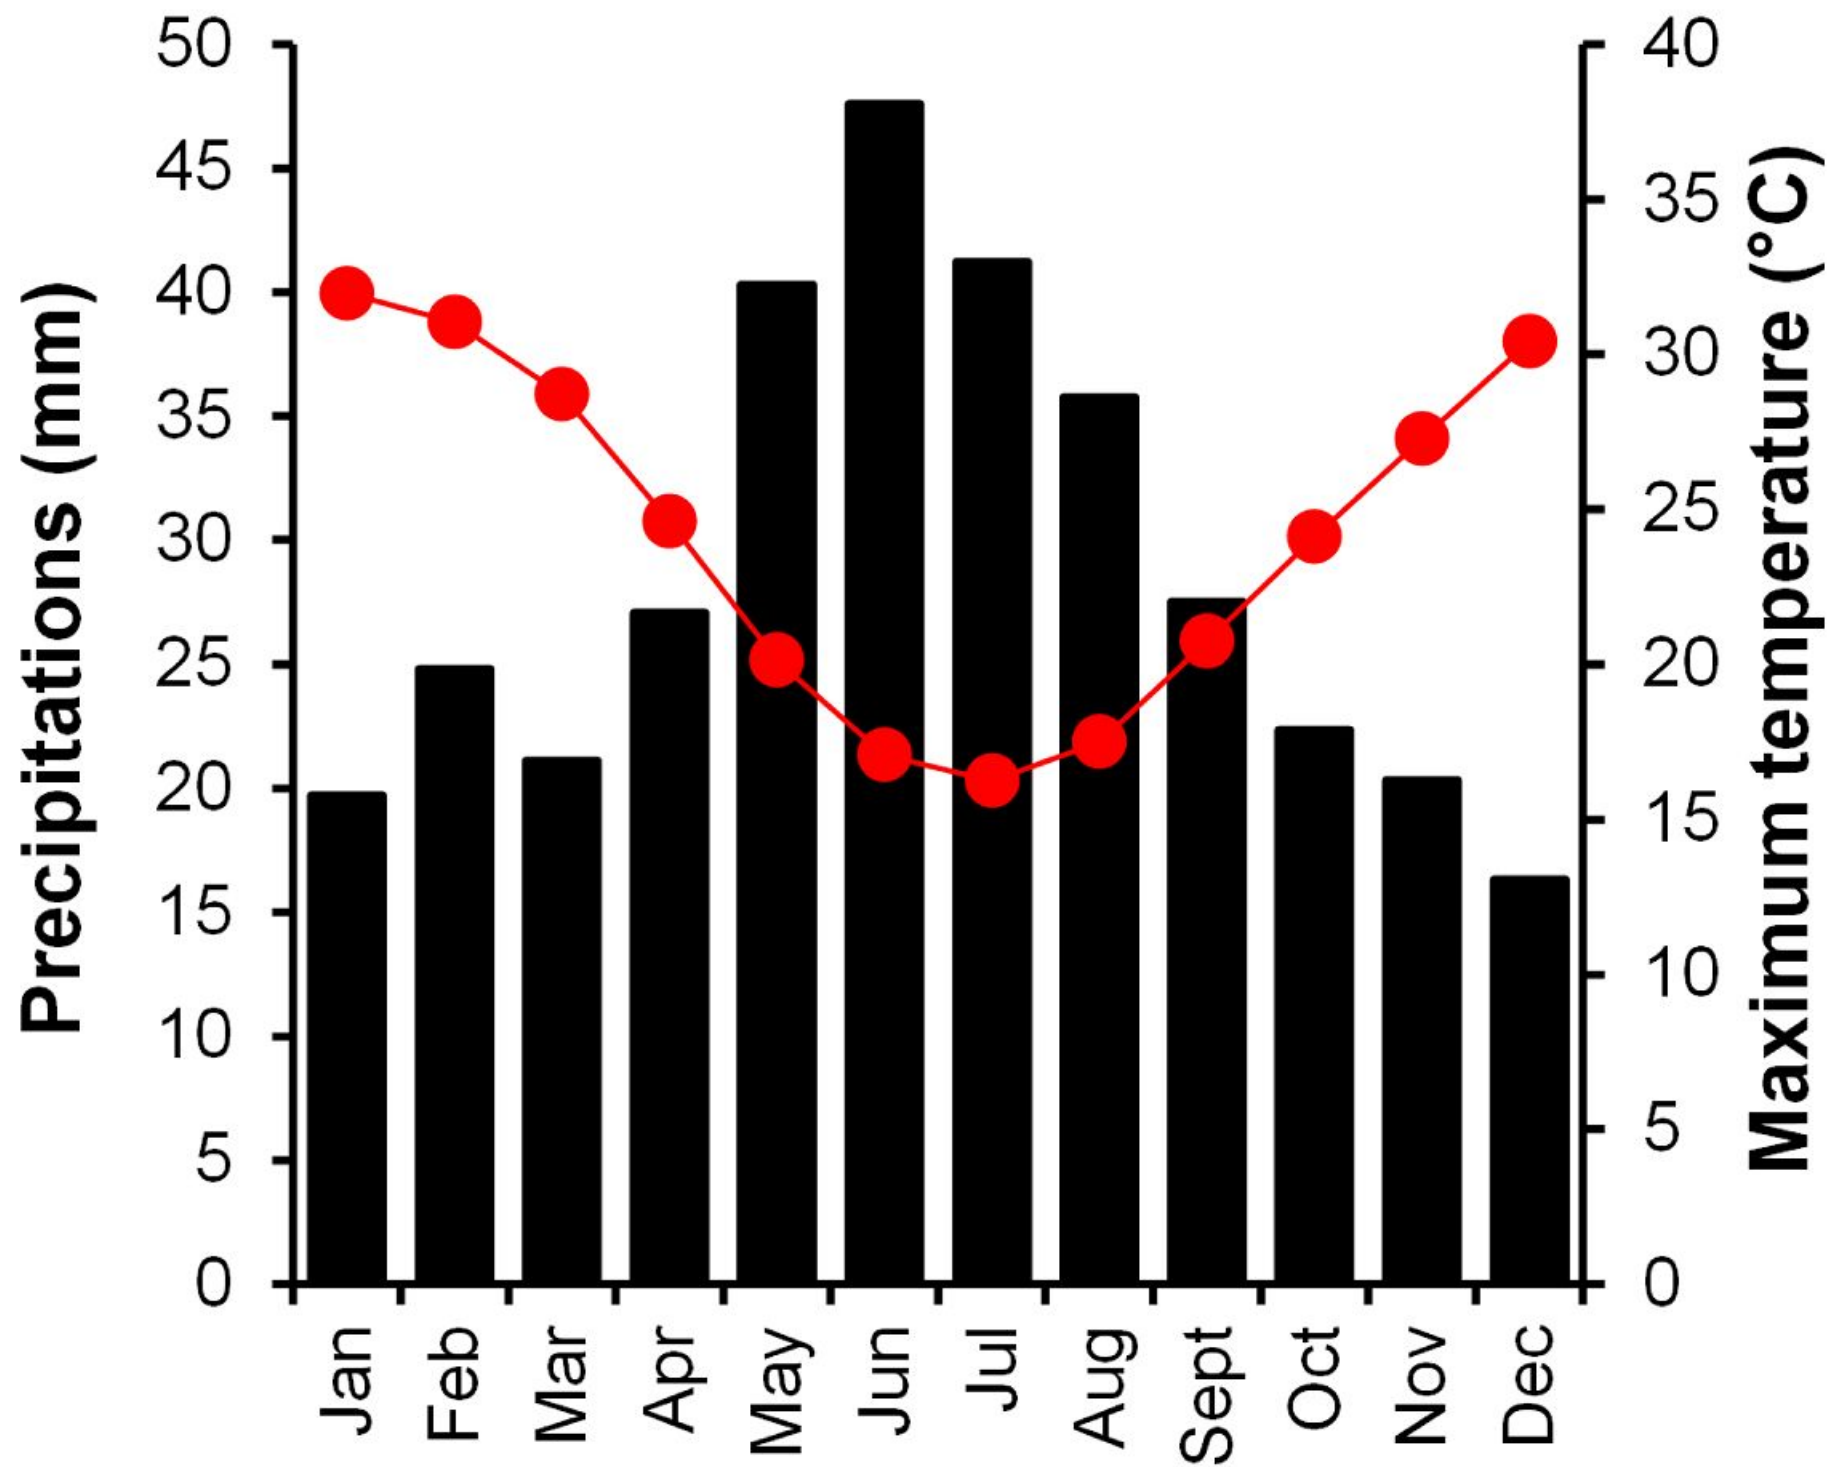

**Figure S1.** Climate diagram of average monthly precipitations and maximum temperatures for *Callitris tuberculata*'s estimated range. Black bars represent monthly precipitations, and the red curve shows maximum temperatures.
