# Supplementary material
Source: PubMed Central journal article supplement (PMC4741339)
Supplement: supp_pp.15.00223_PP2015-00223R2_Supplemental_Materialfig2.pdf [file supp_pp.15.00223_PP2015-00223R2_Supplemental_Materialfig2.pdf]

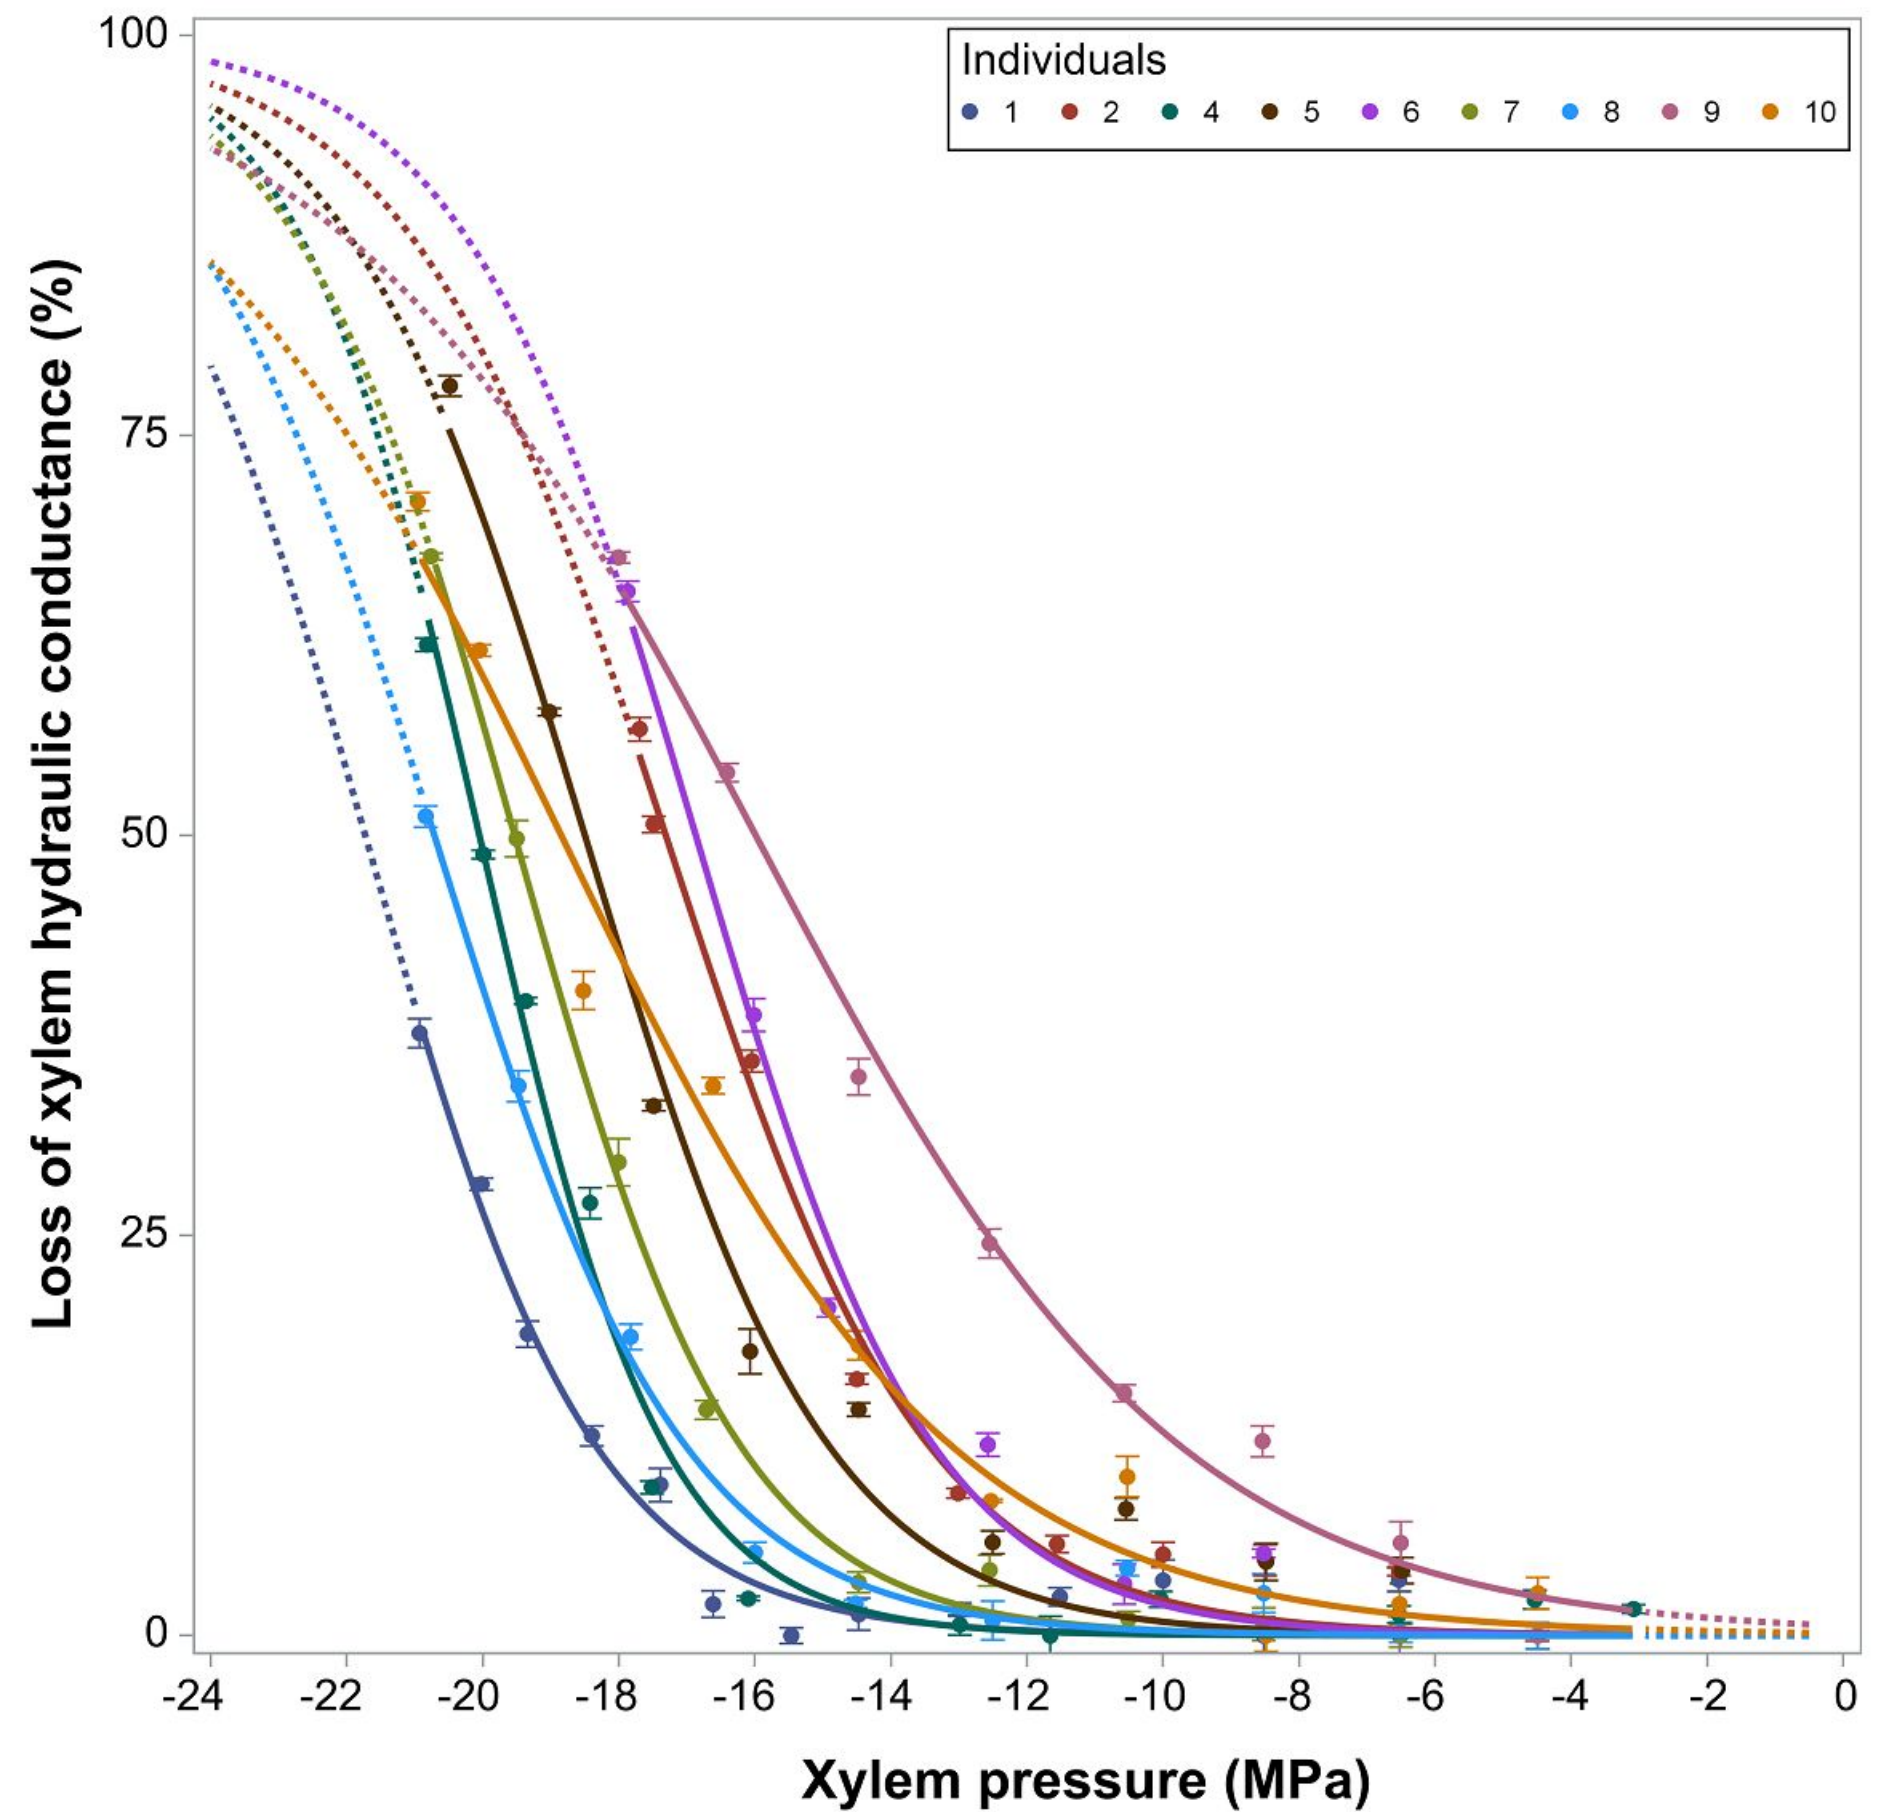

**Figure S2.** Vulnerability curves for nine individual trees of *Callitris tuberculata*. Each point represents mean value of percent loss of hydraulic conductance over at least three measurements of hydraulic conductance (bars represent  $\pm$  standard error). Lines represent the Pammenter model fit to each individual curve, and dashed lines show where the model was expanded beyond experimental data.
