# Supplementary material
Source: PubMed Central journal article supplement (PMC4741339)
Supplement: supp_pp.15.00223_PP2015-00223R2_Supplemental_Materialtbl.pdf [file supp_pp.15.00223_PP2015-00223R2_Supplemental_Materialtbl.pdf]

**Supplemental Table S1.** Cavitation resistance parameters for each individual.  $P_{50}$ ,  $P_{12}$  and  $P_{88}$  are respectively, the xylem pressure inducing 50%, 12% and 88% loss of xylem hydraulic conductance.  $S$  is the slope of the vulnerability curve at  $P_{50}$ .  $ks$  is the specific xylem conductivity, a standardized measurement of the samples' capacity to transport water.

| Individual | $P_{50}$ (MPa) | $P_{12}$ (MPa) | $P_{88}$ (MPa) | $S$ (%.MPa <sup>-1</sup> ) | $ks$ (kg.m <sup>-1</sup> .s <sup>-1</sup> .MPa <sup>-1</sup> ) |
|------------|----------------|----------------|----------------|----------------------------|----------------------------------------------------------------|
| 1          | -21.73         | -18.35         | -25.11         | 14.80                      | 0.000390                                                       |
| 2          | -17.31         | -13.45         | -21.17         | 12.96                      | 0.000359                                                       |
| 4          | -20.05         | -17.33         | -22.76         | 18.42                      | 0.000261                                                       |
| 5          | -18.50         | -14.92         | -22.07         | 13.99                      | 0.000468                                                       |
| 6          | -16.87         | -13.38         | -20.35         | 14.34                      | 0.000344                                                       |
| 7          | -19.53         | -16.22         | -22.84         | 15.10                      | 0.000566                                                       |
| 8          | -20.71         | -17.03         | -24.39         | 13.58                      | 0.000329                                                       |
| 9          | -15.99         | -9.77          | -22.20         | 8.04                       | 0.000484                                                       |
| 10         | -18.85         | -13.13         | -24.56         | 8.75                       | 0.000226                                                       |
| Average    | -18.84         | -14.84         | -22.83         | 13.33                      | 0.000381                                                       |
